# Supplementary material for: 3D-printed Ag–AgCl electrodes for laboratory measurements of self-potential
Source: Copernicus journal article supplement (doi:10.5194/gi-12-259-2023), 2023-12-15
Supplement: Supplementary file 2 [file gi-12-259-2023-supplement.zip]

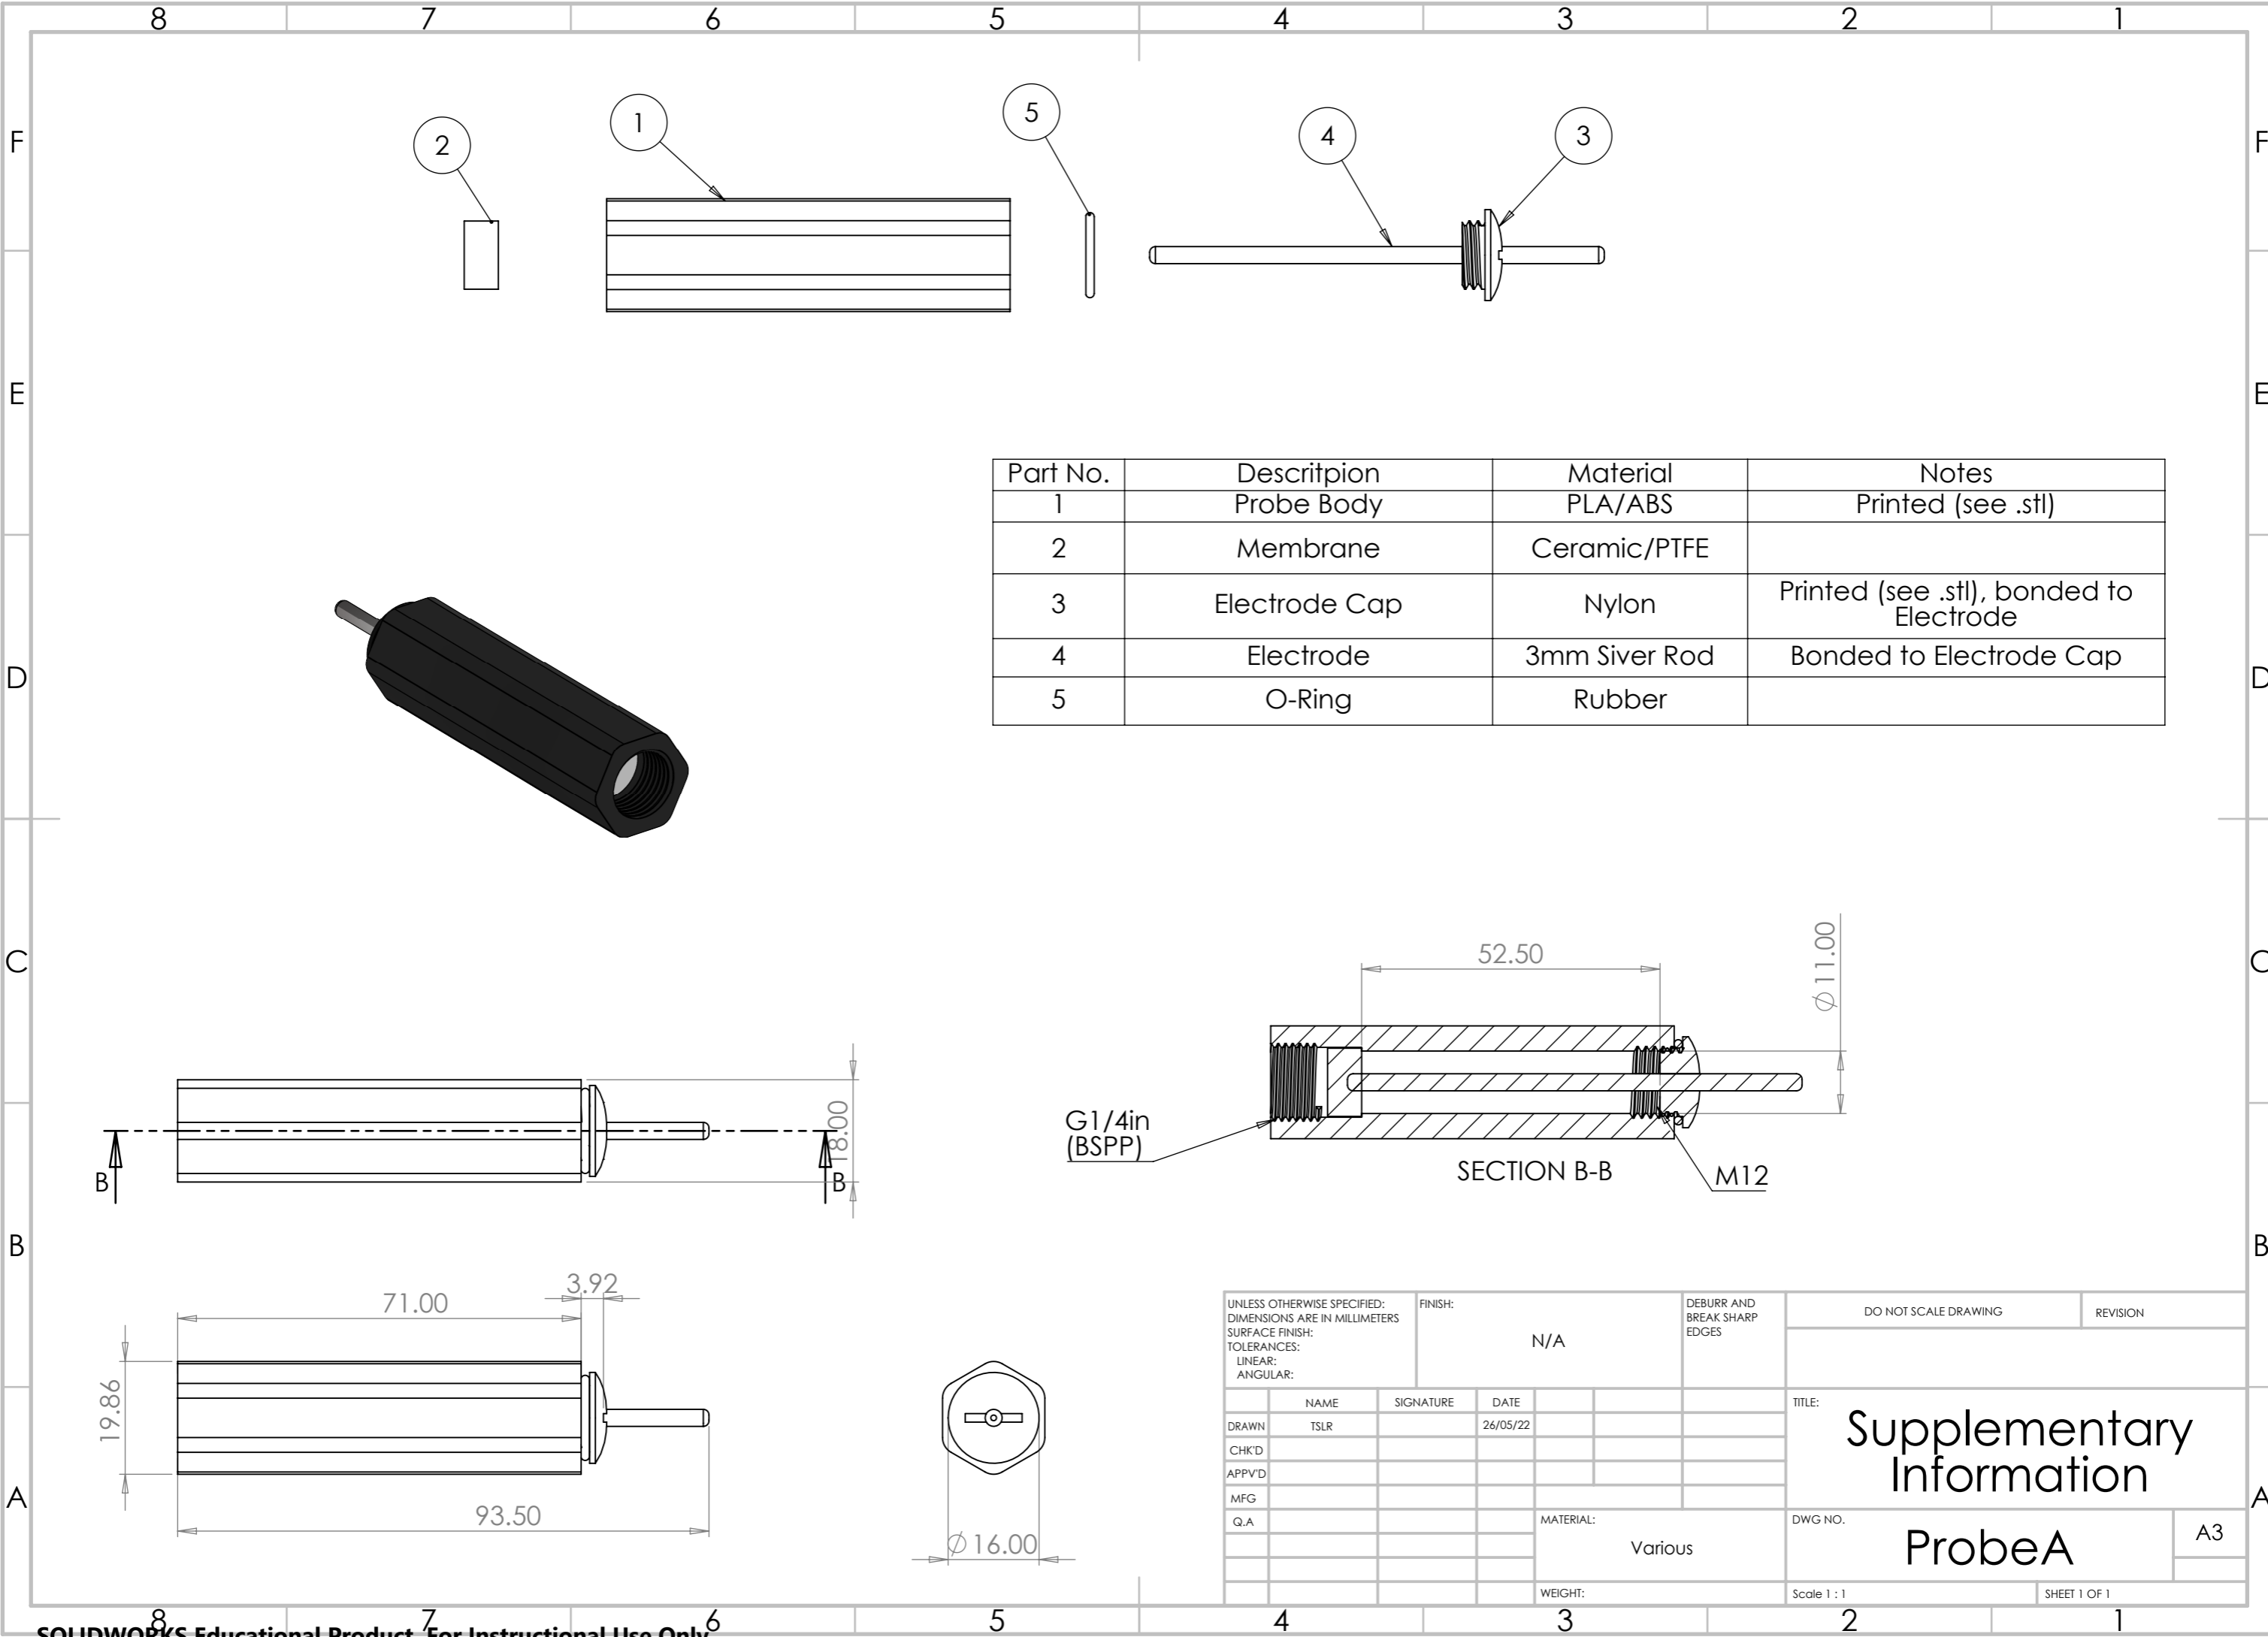

| Part No. | Descritpion   | Material      | Notes                                   |
|----------|---------------|---------------|-----------------------------------------|
| 1        | Probe Body    | PLA/ABS       | Printed (see .stl)                      |
| 2        | Membrane      | Ceramic/PTFE  |                                         |
| 3        | Electrode Cap | Nylon         | Printed (see .stl), bonded to Electrode |
| 4        | Electrode     | 3mm Siver Rod | Bonded to Electrode Cap                 |
| 5        | O-Ring        | Rubber        |                                         |

|                                                                                                                       |      |  |           |  |          |  |                                    |  |                                                          |  |              |  |
|-----------------------------------------------------------------------------------------------------------------------|------|--|-----------|--|----------|--|------------------------------------|--|----------------------------------------------------------|--|--------------|--|
| UNLESS OTHERWISE SPECIFIED:<br>DIMENSIONS ARE IN MILLIMETERS<br>SURFACE FINISH:<br>TOLERANCES:<br>LINEAR:<br>ANGULAR: |      |  | FINISH:   |  | N/A      |  | DEBURR AND<br>BREAK SHARP<br>EDGES |  | DO NOT SCALE DRAWING                                     |  | REVISION     |  |
|                                                                                                                       |      |  |           |  |          |  |                                    |  |                                                          |  |              |  |
|                                                                                                                       | NAME |  | SIGNATURE |  | DATE     |  |                                    |  | TITLE:<br><br>Supplementary<br>Information<br><br>ProbeA |  |              |  |
| DRAWN                                                                                                                 | TSLR |  |           |  | 26/05/22 |  |                                    |  |                                                          |  |              |  |
| CHK'D                                                                                                                 |      |  |           |  |          |  |                                    |  |                                                          |  |              |  |
| APPV'D                                                                                                                |      |  |           |  |          |  |                                    |  |                                                          |  |              |  |
| MFG                                                                                                                   |      |  |           |  |          |  |                                    |  |                                                          |  |              |  |
| Q.A                                                                                                                   |      |  |           |  |          |  |                                    |  |                                                          |  |              |  |
|                                                                                                                       |      |  |           |  |          |  | MATERIAL:<br><br>Various           |  | DWG NO.<br><br>ProbeA                                    |  | A3           |  |
|                                                                                                                       |      |  |           |  |          |  |                                    |  |                                                          |  |              |  |
|                                                                                                                       |      |  |           |  |          |  |                                    |  |                                                          |  |              |  |
|                                                                                                                       |      |  |           |  |          |  | WEIGHT:                            |  | Scale 1 : 1                                              |  | SHEET 1 OF 1 |  |
