# Supplementary material for: 3D-printed Ag–AgCl electrodes for laboratory measurements of self-potential
Source: Copernicus journal article supplement (doi:10.5194/gi-12-259-2023), 2023-12-15
Supplement: Supplementary file 3 [file gi-12-259-2023-supplement.zip]

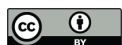

*Supplement of*

## **3D-printed Ag–AgCl electrodes for laboratory measurements of self-potential**

**Thomas S. L. Rowan et al.**

*Correspondence to:* Thomas S. L. Rowan (t.rowan@imperial.ac.uk)

- gi-12-259-2023-supplement-title-page.pdf
- Electrode\_Printing\_Files
  - ElectrodeB\_Body.STL
  - ElectrodeB\_GlandAdaptor.STL
  - Electrode\_A\_Drawing.pdf
  - Electrode\_B\_Drawing.pdf

The copyright of individual parts of the supplement might differ from the article licence.
