# Supplementary figures and images for: 3D-printed Ag–AgCl electrodes for laboratory measurements of self-potential
Source: Copernicus journal article supplement (doi:10.5194/gi-12-259-2023), 2023-12-15

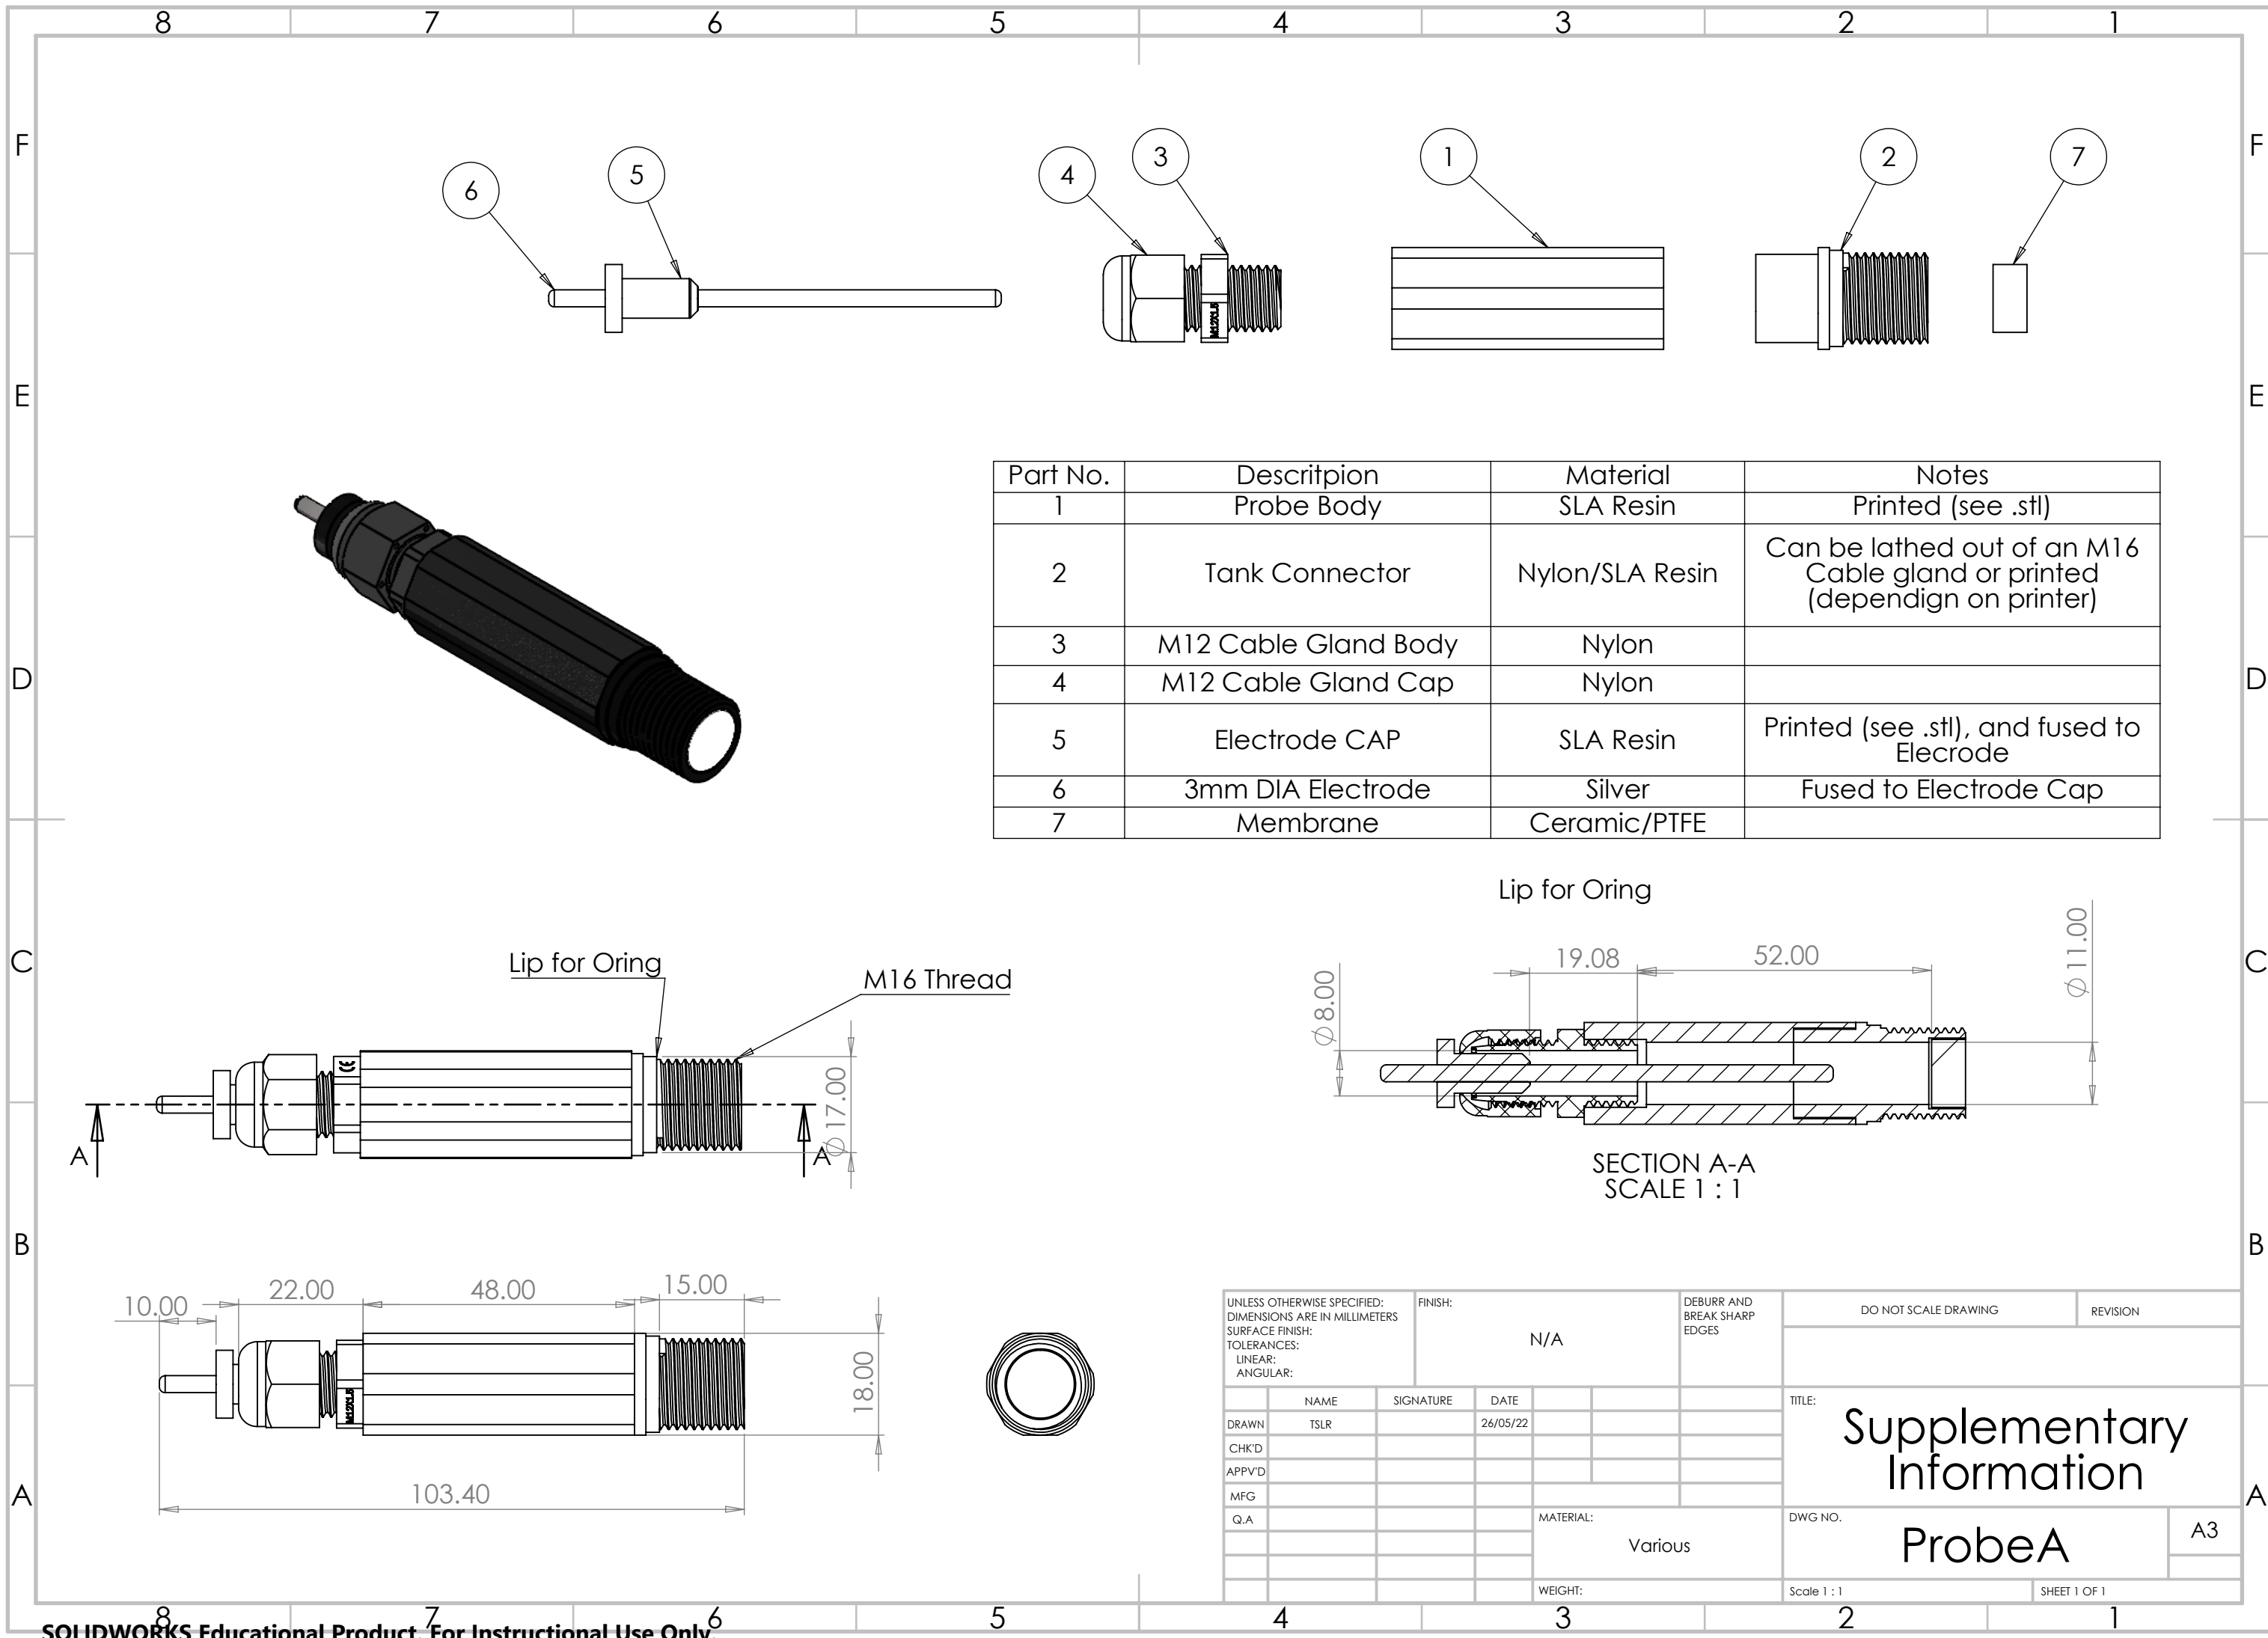

Supplement: Supplementary file 1 [file gi-12-259-2023-supplement.zip]
